# Supplementary material for: New methodology for the N-alkylation of 2-amino-3-acylthiophenes
Source: Royal Society of Chemistry journal article supplement (doi:10.1039/c0ob01156h), 2011-01-01
Supplement: c0ob01156h.pdf [file c0ob01156h.pdf]

**Supplementary Material (ESI) for Organic & Biomolecular Chemistry**

**New Methodology for the N-Alkylation of 2-Amino-3-acylthiophenes**

**Luigi Aurelio,<sup>a</sup> Bernard L. Flynn,<sup>a</sup> and Peter J. Scammells<sup>a,\*</sup>**

<sup>a</sup> *Medicinal Chemistry and Drug Action, Monash Institute of Pharmaceutical Sciences, Monash University, 381 Royal Parade, Parkville, Victoria, 3052, Australia. E-mail: peter.scammells@monash.edu; Fax: (+61) 3 9903 9582; Tel: (+61) 3 9903 9542*

Ethyl 2-(methylamino)-4,5,6,7-tetrahydrobenzo[*b*]thiophene-3-carboxylate (**8a**)

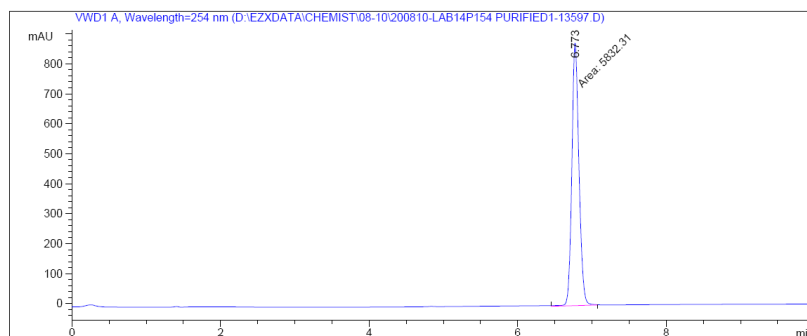

=====  
Area Percent Report  
=====

Sorted By : Signal  
Multiplier: : 1.0000  
Dilution: : 1.0000  
Use Multiplier & Dilution Factor with ISTDs

Signal 1: VWD1 A, Wavelength=254 nm

| Peak # | RetTime [min] | Type | Width [min] | Area mAU *s | Height [mAU] | Area %   |
|--------|---------------|------|-------------|-------------|--------------|----------|
| 1      | 6.773         | MM   | 0.1108      | 5832.31494  | 877.49347    | 100.0000 |

Totals : 5832.31494 877.49347

Ethyl 2-(ethylamino)-4,5,6,7-tetrahydrobenzo[*b*]thiophene-3-carboxylate (**8b**)

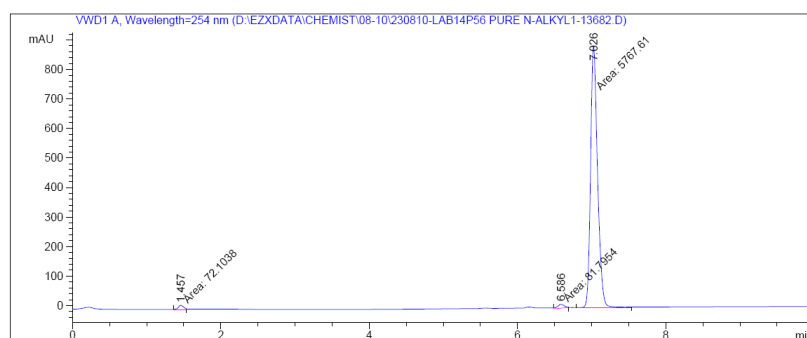

=====  
Area Percent Report  
=====

Sorted By : Signal  
Multiplier: : 1.0000  
Dilution: : 1.0000  
Use Multiplier & Dilution Factor with ISTDs

Signal 1: VWD1 A, Wavelength=254 nm

| Peak # | RetTime [min] | Type | Width [min] | Area mAU *s | Height [mAU] | Area %  |
|--------|---------------|------|-------------|-------------|--------------|---------|
| 1      | 1.457         | MM   | 0.0852      | 72.10382    | 14.10571     | 1.2177  |
| 2      | 6.586         | MM   | 0.1031      | 81.79545    | 13.22071     | 1.3813  |
| 3      | 7.026         | MM   | 0.1082      | 5767.61230  | 888.02972    | 97.4010 |

Totals : 5921.51157 915.35614

Ethyl 2-(propylamino)-4,5,6,7-tetrahydrobenzo[*b*]thiophene-3-carboxylate (**8c**)

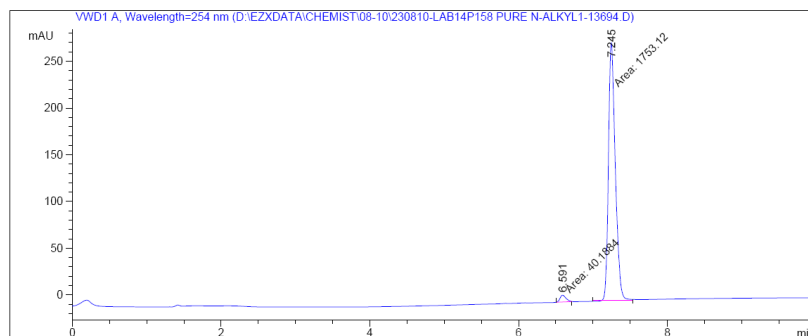

=====  
Area Percent Report  
=====

Sorted By : Signal  
Multiplier: : 1.0000  
Dilution: : 1.0000  
Use Multiplier & Dilution Factor with ISTDs

Signal 1: VWD1 A, Wavelength=254 nm

| Peak # | RetTime [min] | Type | Width [min] | Area mAU   | Area *s   | Height [mAU] | Area % |
|--------|---------------|------|-------------|------------|-----------|--------------|--------|
| 1      | 6.591         | MM   | 0.0923      | 40.18841   | 7.25886   | 2.2410       |        |
| 2      | 7.245         | MM   | 0.1060      | 1753.11816 | 275.73428 | 97.7590      |        |

Totals : 1793.30658 282.99314

2-(butylamino)-4,5,6,7-tetrahydrobenzo[*b*]thiophene-3-carboxylate (**8d**)

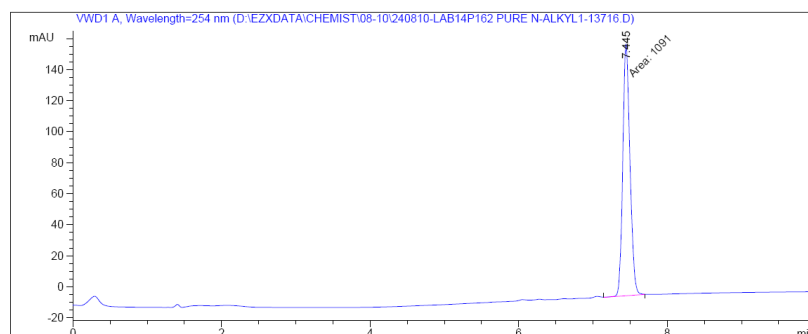

=====  
Area Percent Report  
=====

Sorted By : Signal  
Multiplier: : 1.0000  
Dilution: : 1.0000  
Use Multiplier & Dilution Factor with ISTDs

Signal 1: VWD1 A, Wavelength=254 nm

| Peak # | RetTime [min] | Type | Width [min] | Area mAU   | Area *s   | Height [mAU] | Area % |
|--------|---------------|------|-------------|------------|-----------|--------------|--------|
| 1      | 7.445         | MM   | 0.1120      | 1090.99902 | 162.35892 | 100.0000     |        |

Totals : 1090.99902 162.35892

2-(Allylamino)-4,5,6,7-tetrahydrobenzo[*b*]thiophene-3-carboxylate (**8e**)

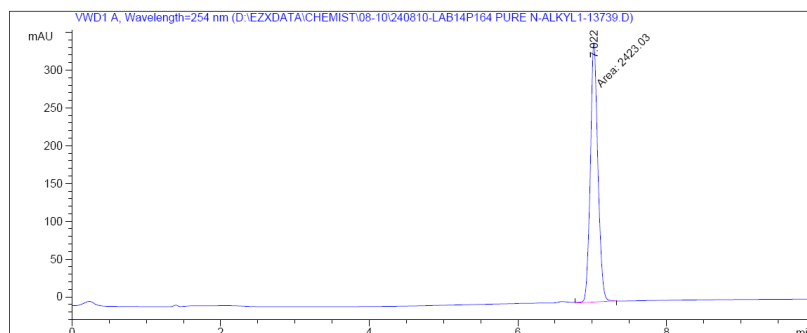

=====  
Area Percent Report  
=====

Sorted By : Signal  
Multiplier: : 1.0000  
Dilution: : 1.0000  
Use Multiplier & Dilution Factor with ISTDs

Signal 1: VWD1 A, Wavelength=254 nm

| Peak # | RetTime [min] | Type | Width [min] | Area mAU *s | Height [mAU] | Area %   |
|--------|---------------|------|-------------|-------------|--------------|----------|
| 1      | 7.022         | MM   | 0.1178      | 2423.03149  | 342.69989    | 100.0000 |

Totals : 2423.03149 342.69989

Ethyl 2-(prop-2-yn-1-ylamino)-4,5,6,7-tetrahydrobenzo[*b*]thiophene-3-carboxylate (**8f**)

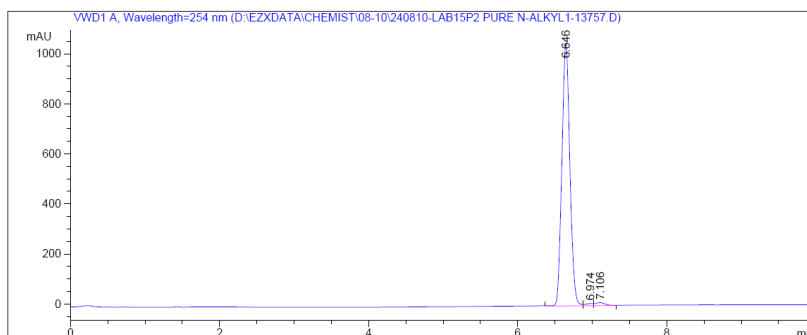

=====  
Area Percent Report  
=====

Sorted By : Signal  
Multiplier: : 1.0000  
Dilution: : 1.0000  
Use Multiplier & Dilution Factor with ISTDs

Signal 1: VWD1 A, Wavelength=254 nm

| Peak # | RetTime [min] | Type | Width [min] | Area mAU *s | Height [mAU] | Area %  |
|--------|---------------|------|-------------|-------------|--------------|---------|
| 1      | 6.646         | VV   | 0.1132      | 7834.58496  | 1051.01794   | 97.8078 |
| 2      | 6.974         | VV   | 0.0995      | 60.24644    | 8.72771      | 0.7521  |
| 3      | 7.106         | VV   | 0.1362      | 115.35637   | 12.08009     | 1.4401  |

Totals : 8010.18777 1071.82574

Ethyl 2-(benzylamino)-4,5,6,7-tetrahydrobenzo[*b*]thiophene-3-carboxylate (**8g**)

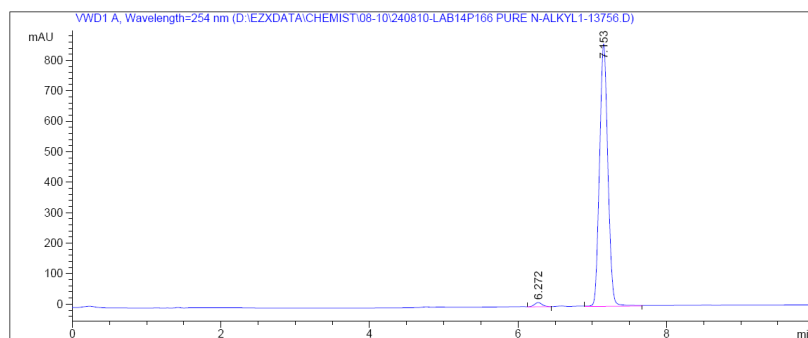

=====  
Area Percent Report  
=====

Sorted By : Signal  
Multiplier: : 1.0000  
Dilution: : 1.0000  
Use Multiplier & Dilution Factor with ISTDs

Signal 1: VWD1 A, Wavelength=254 nm

| Peak # | RetTime [min] | Type | Width [min] | Area mAU *s | Height [mAU] | Area %  |
|--------|---------------|------|-------------|-------------|--------------|---------|
| 1      | 6.272         | VV   | 0.1129      | 106.23212   | 14.05319     | 1.5572  |
| 2      | 7.153         | VB   | 0.1172      | 6715.82520  | 860.96240    | 98.4428 |

Totals : 6822.05731 875.01559

Ethyl 2-(isopropylamino)-4,5,6,7-tetrahydrobenzo[*b*]thiophene-3-carboxylate (**11**)

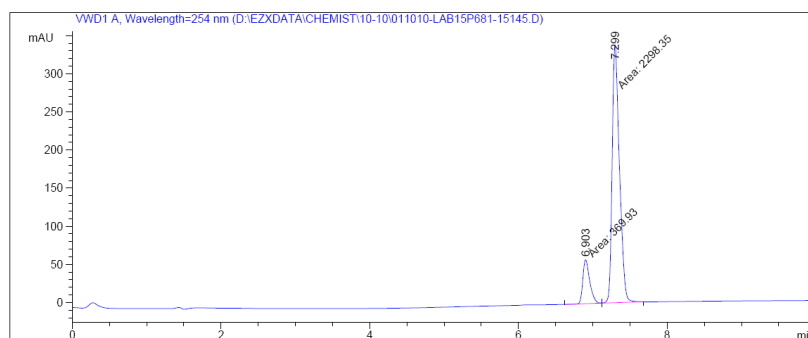

=====  
Area Percent Report  
=====

Sorted By : Signal  
Multiplier: : 1.0000  
Dilution: : 1.0000  
Use Multiplier & Dilution Factor with ISTDs

Signal 1: VWD1 A, Wavelength=254 nm

| Peak # | RetTime [min] | Type | Width [min] | Area mAU *s | Height [mAU] | Area %  |
|--------|---------------|------|-------------|-------------|--------------|---------|
| 1      | 6.903         | MF   | 0.1071      | 369.93048   | 57.59196     | 13.8640 |
| 2      | 7.299         | FM   | 0.1132      | 2298.34546  | 338.51202    | 86.1360 |

Totals : 2668.27594 396.10398

(4-Chlorophenyl)(2-(methylamino)-4,5,6,7-tetrahydrobenzo[*b*]thiophen-3-yl)methanone (**24a**)

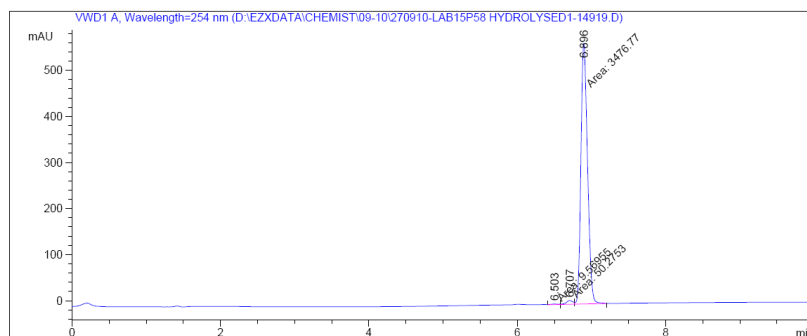

=====  
Area Percent Report  
=====

Sorted By : Signal  
Multiplier: : 1.0000  
Dilution: : 1.0000  
Use Multiplier & Dilution Factor with ISTDs

Signal 1: VWD1 A, Wavelength=254 nm

| Peak # | RetTime [min] | Type | Width [min] | Area mAU *s | Height [mAU] | Area %  |
|--------|---------------|------|-------------|-------------|--------------|---------|
| 1      | 6.503         | MF   | 0.1187      | 9.56955     | 1.34326      | 0.2706  |
| 2      | 6.707         | MF   | 0.1026      | 50.27529    | 8.16507      | 1.4216  |
| 3      | 6.896         | FM   | 0.1023      | 3476.76782  | 566.32275    | 98.3078 |

Totals : 3536.61266 575.83108

(2-(Butylamino)-4,5,6,7-tetrahydrobenzo[*b*]thiophen-3-yl)(4-chlorophenyl)methanone (**24b**)

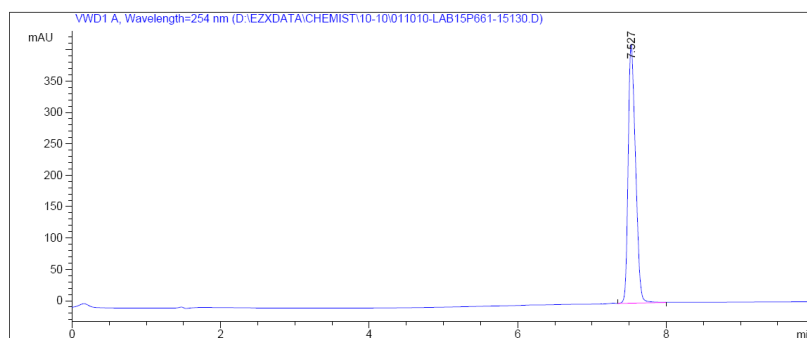

=====  
Area Percent Report  
=====

Sorted By : Signal  
Multiplier: : 1.0000  
Dilution: : 1.0000  
Use Multiplier & Dilution Factor with ISTDs

Signal 1: VWD1 A, Wavelength=254 nm

| Peak # | RetTime [min] | Type | Width [min] | Area mAU *s | Height [mAU] | Area %   |
|--------|---------------|------|-------------|-------------|--------------|----------|
| 1      | 7.527         | VB   | 0.1051      | 2840.16919  | 412.46588    | 100.0000 |

Totals : 2840.16919 412.46588

(2-(Benzylamino)-4,5,6,7-tetrahydrobenzo[*b*]thiophen-3-yl)(4-chlorophenyl)methanone (**24c**)

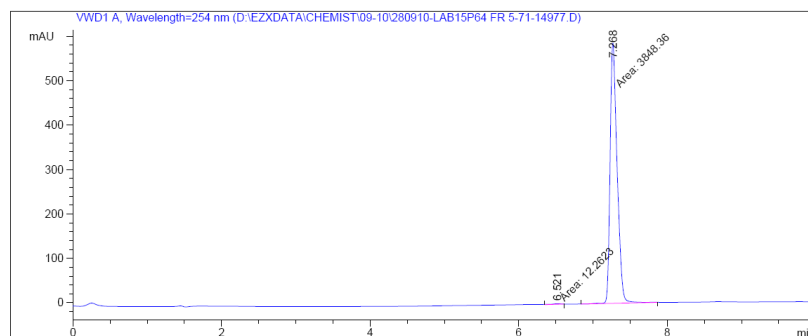

=====  
Area Percent Report  
=====

Sorted By : Signal  
Multiplier: : 1.0000  
Dilution: : 1.0000  
Use Multiplier & Dilution Factor with ISTDs

Signal 1: WVD1 A, Wavelength=254 nm

| Peak # | RetTime [min] | Type | Width [min] | Area [mAU*s] | Height [mAU] | Area %  |
|--------|---------------|------|-------------|--------------|--------------|---------|
| 1      | 6.521         | MM   | 0.1452      | 12.26229     | 1.40729      | 0.3176  |
| 2      | 7.268         | MM   | 0.1092      | 3848.35645   | 587.43463    | 99.6824 |

Totals : 3860.61874 588.84192

Ethyl 3-(3-chlorophenyl)-5-(methylamino)-4-oxo-3,4-dihydrothieno[3,4-*d*]pyridazine-1-carboxylate (**27a**)

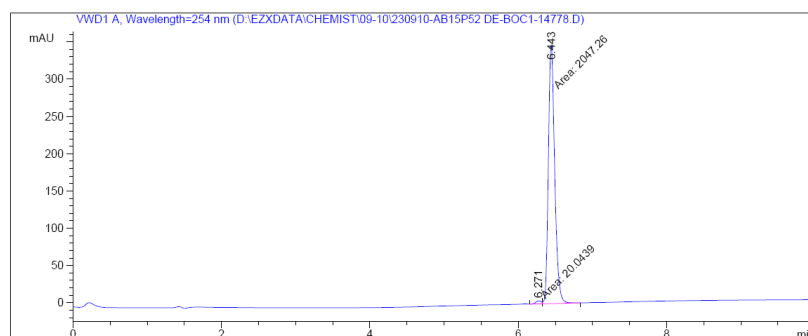

=====  
Area Percent Report  
=====

Sorted By : Signal  
Multiplier: : 1.0000  
Dilution: : 1.0000  
Use Multiplier & Dilution Factor with ISTDs

Signal 1: WVD1 A, Wavelength=254 nm

| Peak # | RetTime [min] | Type | Width [min] | Area [mAU*s] | Height [mAU] | Area %  |
|--------|---------------|------|-------------|--------------|--------------|---------|
| 1      | 6.271         | MF   | 0.0847      | 20.04388     | 3.94341      | 0.9696  |
| 2      | 6.443         | FM   | 0.0981      | 2047.26221   | 347.68423    | 99.0304 |

Totals : 2067.30609 351.62764

Butyl 5-(butylamino)-3-(3-chlorophenyl)-4-oxo-3,4-dihydrothieno[3,4-*d*]pyridazine-1-carboxylate  
(27b)

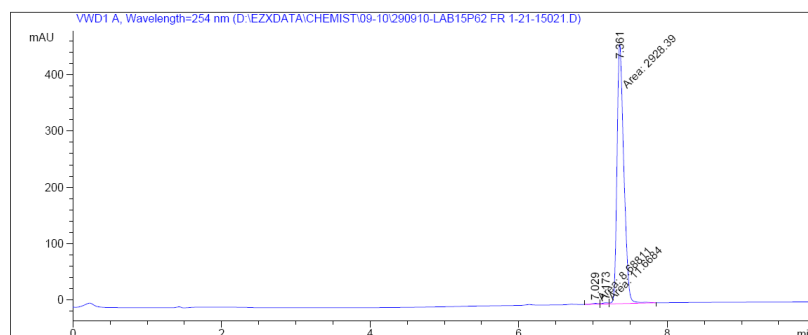

=====  
Area Percent Report  
=====

Sorted By : Signal  
Multiplier: : 1.0000  
Dilution: : 1.0000  
Use Multiplier & Dilution Factor with ISTDs

Signal 1: VWD1 A, Wavelength=254 nm

| Peak # | RetTime [min] | Type | Width [min] | Area mAU *s | Height [mAU] | Area %  |
|--------|---------------|------|-------------|-------------|--------------|---------|
| 1      | 7.029         | MF   | 0.0900      | 8.68811     | 1.60964      | 0.2946  |
| 2      | 7.173         | MF   | 0.0867      | 11.66838    | 2.24335      | 0.3957  |
| 3      | 7.361         | FM   | 0.1059      | 2928.38525  | 461.04764    | 99.3097 |

Totals : 2948.74174 464.90063

Ethyl 5-(butylamino)-3-(3-chlorophenyl)-4-oxo-3,4-dihydrothieno[3,4-*d*]pyridazine-1-carboxylate  
(27c)

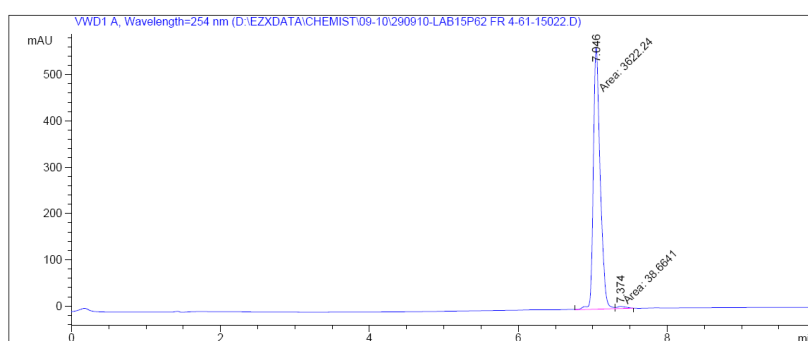

=====  
Area Percent Report  
=====

Sorted By : Signal  
Multiplier: : 1.0000  
Dilution: : 1.0000  
Use Multiplier & Dilution Factor with ISTDs

Signal 1: VWD1 A, Wavelength=254 nm

| Peak # | RetTime [min] | Type | Width [min] | Area mAU *s | Height [mAU] | Area %  |
|--------|---------------|------|-------------|-------------|--------------|---------|
| 1      | 7.046         | MF   | 0.1066      | 3622.24316  | 566.26776    | 98.9439 |
| 2      | 7.374         | FM   | 0.1391      | 38.66413    | 4.63285      | 1.0561  |

Totals : 3660.90730 570.90061



Ethyl 5-(benzylamino)-3-(3-chlorophenyl)-4-oxo-3,4-dihydrothieno[3,4-*d*]pyridazine-1-carboxylate  
(27d)

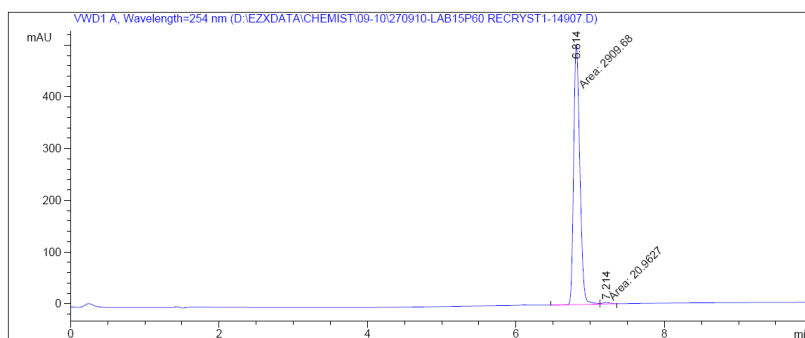

=====  
Area Percent Report  
=====

Sorted By : Signal  
Multiplier: : 1.0000  
Dilution: : 1.0000  
Use Multiplier & Dilution Factor with ISTDs

Signal 1: VWD1 A, Wavelength=254 nm

| Peak # | RetTime [min] | Type | Width [min] | Area mAU   | Area %  | Height [mAU] | Area %  |
|--------|---------------|------|-------------|------------|---------|--------------|---------|
| 1      | 6.814         | MF   | 0.0963      | 2309.68164 | 99.2847 | 503.77374    | 99.2847 |
| 2      | 7.214         | FM   | 0.1217      | 20.96273   | 0.7153  | 2.86968      | 0.7153  |

Totals : 2930.64437 506.64342

(2-(Methylamino)phenyl)(phenyl)methanone (31a)

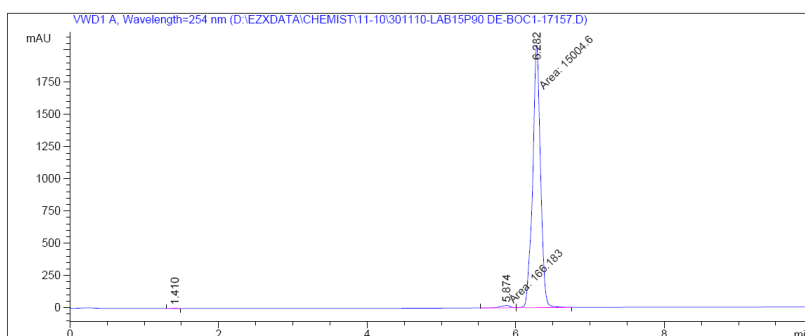

=====  
Area Percent Report  
=====

Sorted By : Signal  
Multiplier: : 1.0000  
Dilution: : 1.0000  
Use Multiplier & Dilution Factor with ISTDs

Signal 1: VWD1 A, Wavelength=254 nm

| Peak # | RetTime [min] | Type | Width [min] | Area mAU  | Area %  | Height [mAU] | Area %  |
|--------|---------------|------|-------------|-----------|---------|--------------|---------|
| 1      | 1.410         | EV   | 0.0967      | 14.80281  | 0.0975  | 2.40142      | 0.0975  |
| 2      | 5.874         | MF   | 0.1498      | 166.18314 | 1.0943  | 18.48588     | 1.0943  |
| 3      | 6.282         | FM   | 0.1225      | 15004.6e4 | 98.8082 | 2041.75513   | 98.8082 |

Totals : 1.51856e4 2062.64242

(2-(Butylamino)phenyl)(phenyl)methanone (**31b**)

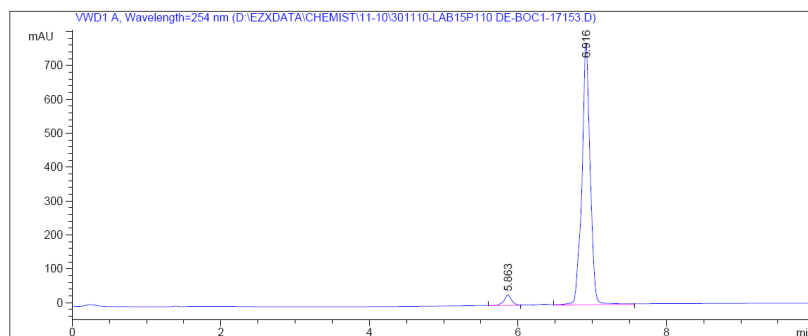

=====  
Area Percent Report  
=====

Sorted By : Signal  
Multiplier: : 1.0000  
Dilution: : 1.0000  
Use Multiplier & Dilution Factor with ISTDs

Signal 1: VWD1 A, Wavelength=254 nm

| Peak # | RetTime [min] | Type | Width [min] | Area mAU *s | Height [mAU] | Area %  |
|--------|---------------|------|-------------|-------------|--------------|---------|
| 1      | 5.863         | VV   | 0.1059      | 232.22896   | 31.68933     | 3.7236  |
| 2      | 6.916         | VB   | 0.1097      | 6004.51367  | 772.11945    | 96.2764 |

Totals : 6236.74263 803.80878

(2-(benzylamino)phenyl)(phenyl)methanone (**31c**)

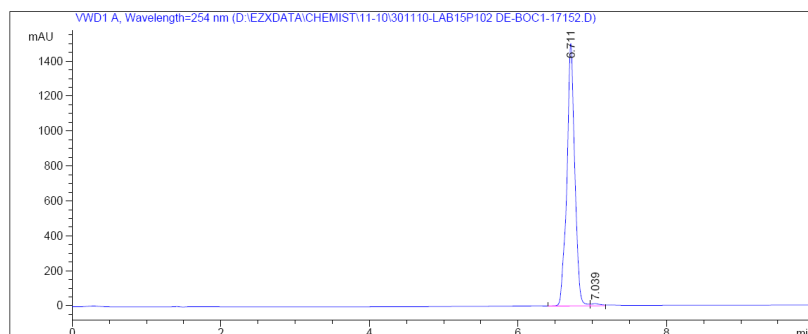

=====  
Area Percent Report  
=====

Sorted By : Signal  
Multiplier: : 1.0000  
Dilution: : 1.0000  
Use Multiplier & Dilution Factor with ISTDs

Signal 1: VWD1 A, Wavelength=254 nm

| Peak # | RetTime [min] | Type | Width [min] | Area mAU *s | Height [mAU] | Area %  |
|--------|---------------|------|-------------|-------------|--------------|---------|
| 1      | 6.711         | VV   | 0.1067      | 1.11203e4   | 1503.31287   | 98.9844 |
| 2      | 7.039         | VV   | 0.1189      | 114.09492   | 13.11741     | 1.0156  |

Totals : 1.12344e4 1516.43028

1-(Methylamino)-9H-fluoren-9-one (**34a**)

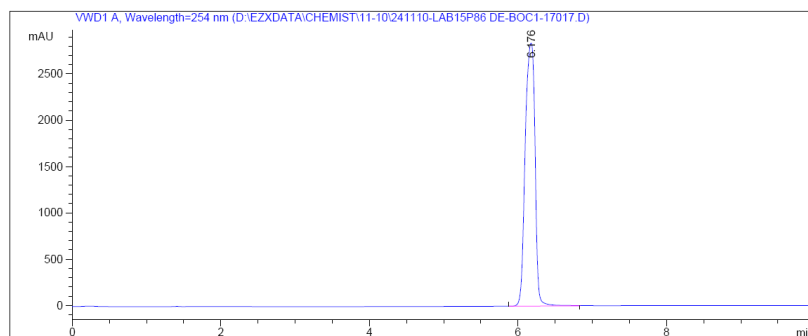

=====  
Area Percent Report  
=====

Sorted By : Signal  
Multiplier: : 1.0000  
Dilution: : 1.0000  
Use Multiplier & Dilution Factor with ISTDs

Signal 1: VWd1 A, Wavelength=254 nm

| Peak # | RetTime [min] | Type | Width [min] | Area mAU *s | Height [mAU] | Area %   |
|--------|---------------|------|-------------|-------------|--------------|----------|
| 1      | 6.176         | VV   | 0.1522      | 2.60810e4   | 2840.75220   | 100.0000 |

Totals : 2.60810e4 2840.75220

1-(Butylamino)-9H-fluoren-9-one (**34b**)

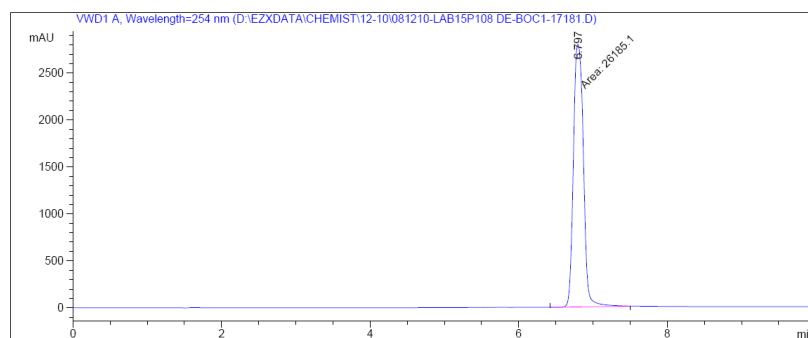

=====  
Area Percent Report  
=====

Sorted By : Signal  
Multiplier: : 1.0000  
Dilution: : 1.0000  
Use Multiplier & Dilution Factor with ISTDs

Signal 1: VWd1 A, Wavelength=254 nm

| Peak # | RetTime [min] | Type | Width [min] | Area mAU *s | Height [mAU] | Area %   |
|--------|---------------|------|-------------|-------------|--------------|----------|
| 1      | 6.797         | MM   | 0.1561      | 2.61851e4   | 2796.01953   | 100.0000 |

Totals : 2.61851e4 2796.01953

1-(Benzylamino)-9H-fluoren-9-one (**34c**)

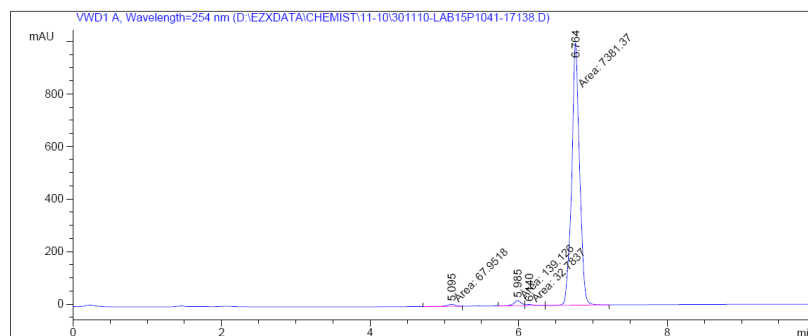

=====  
Area Percent Report  
=====

Sorted By : Signal  
Multiplier: : 1.0000  
Dilution: : 1.0000  
Use Multiplier & Dilution Factor with ISTDs

Signal 1: VWD1 A, Wavelength=254 nm

| Peak # | RetTime [min] | Type | Width [min] | Area mAU *s | Height [mAU] | Area %  |
|--------|---------------|------|-------------|-------------|--------------|---------|
| 1      | 5.095         | MF   | 0.1456      | 67.95181    | 7.77755      | 0.8916  |
| 2      | 5.985         | MF   | 0.1194      | 139.12598   | 19.41591     | 1.8255  |
| 3      | 6.140         | FM   | 0.1207      | 32.78373    | 4.52672      | 0.4302  |
| 4      | 6.764         | FM   | 0.1233      | 7381.36816  | 998.08844    | 96.8527 |

Totals :                   7621.22968 1029.80862
